# Supplementary material for: Bilateral equalization of synaptic output in olfactory glomeruli of Xenopus tadpoles
Source: eLife. 2026 May 15;14:RP107710. doi: 10.7554/eLife.107710 (PMC13179059; doi:10.7554/eLife.107710)
Supplement: Source data 1. [file elife-107710-data1.xlsx]

## Sheet: Figure 2C
Basal_before_CNQX	After CNQX	Basal_before CNQX+AP5	After CNQX+AP5
0.1042	0.0572	0.0858	0.0261
0.058	0.0418	0.1309	0.0781
0.167	0.178	0.1095	0.0276
0.1023	0.0463	0.0692	0.0155		LFP values (mV)
0.0931	0.0214	0.104	0.0283
0.0928	0.0654	0.106	0
0.1173	0.0652
0.1274	0.0495

## Sheet: Figure 3A
Number of GFP+ OSNs	ON_thickness (um)
35	33.41
36	33.99
30	29.34
37	35.84
30	29.57
31	33.56
27	30.26
28	31.27
23	26.19
22	21.73
15	20.06
16	21.48
21	19.77
16	18.73
18	20.86
27	23.41
19	21
16	23.68
35	35.54
26	29.57
45	40.44
29	34.1
33	33.31
36	32.96
31	32.04
20	38.58
19	21.98
12	22.75
41	49.84
40	36.68
42	46.39
52	49.68
46	54.38
46	55.34
42	52.52
17	23.79
22	32.14
21	33.89
20	32.42
19	35.45
27	31.1
45	63
41	63.71
47	65.27

## Sheet: Figure 3D
		Time post_injury
2-7 hours	1-2 days	3-4 days	6-7 days	10-11 days
0.1581	0.245	0.1215	0.0932	0.2067
0.3056	0.1576	0.1857	0.0927	0.0762		LFP values are expressed in mV
0.1295	0.351	0.1659	0.1814	0.124
0.2647	0.1257	0.1327	0.1506	0.1241
0.1456	0.1493	0.1989	0.2219	0.2022
0.106	0.224	0.1999	0.1194	0.1469
0.1194	0.1587	0.1276	0.1504	0.0901
0.1436	0.1704	0.1391	0.1234	0.1376
0.1099	0.1209	0.201		0.1097
0.149	0.1497	0.1785		0.1134
	0.1574	0.1286		0.1462
	0.1904	0.1516
	0.2105
	0.2047

## Sheet: Figure 4B
Optic nerve transection				1-2 d after ON transection
ON Thickness (um)	LFP amplitude (uV)		ON Thickness (um)	LFP amplitude (uV)
29.82	68.6		59.8867	170.4
44.03	69.8		60.6767	120.9
37.59	44.9		68.83	149.7
43.77	92.9		82.81	157.4
39.09	79.1		85.7333	190.4
28.63	101.5		87.2733	210.5
36.39	96.4		60.5767	204.7
36.88	71.7		74.1867	245
48.02	107.9		66.14	157.6
46.6	58.4		66.98	351
45.93	78.4		65.3933	125.7
43.4	130.1		76.7267	149.3
39.44	115.7		63.0033	224
42.81	89.8		72.7233	158.7
42.35	94.9
44.81	51.5
42.82	116.5				LFP changes (uV)

## Sheet: Figure 4C
Hyper_F_control	Hyper_F_transection
1.43	1.62
1.45	1.31
1.14	0.57
0.73	0.92		Values display the ratio of fluorescence detected in olfactory bulbs
1.26	1.46
0.73	0.83
0.64

## Sheet: Figure 4D
ON Transection	ONTransection + Apocynin	ONTransection + DPI
0.1581	0.0935	0.1584
0.3056	0.1894	0.1088
0.1295	0.1155	0.095
0.2647	0.2466	0.076
0.1456	0.1486	0.1762		LFP values are expressed in mV
0.106	0.1228
0.1194	0.1252
0.1436	0.1071
0.1099	0.1086
0.149	0.079

## Sheet: Figure 5F
Amplitude (dF/F)-control	Amplitude (dF/F)-transection		Tau (s)-control	Tau(s)-ON_transection
0.97936	0.40053		3.125	0.462963
0.37023	0.39076		1.66667	0.636943
1.0245	0.40666		1.75439	0.621118
1.0189	0.33883		0.925926	0.719424
0.21755	2.8365		1.19048	0.684932
0.36256	2.6378		0.943396	0.900901
1.3315	2.1678		1.1236	0.89
0.69699	2.498		3.22581	1.07527
0.19476	2.2203		4.34783	1.85185				Analysis of GCaMP6s transients
0.23055	0.48415		0.961538	0.699301
1.1929	3.3198		1.88679
0.36256	0.53377		2.77778
0.21869	3.6835		0.704225
1.0719	0.52538		0.819672
0.88552			0.662252
0.66023			2.5
0.40713			2.27273
0.57549			2.17391
0.56293			0.458716
0.99711			4.34783
1.002			3.44828
1.0889			1.28205
1.064			2.43902
0.97912			2.38095
0.34802			0.826446
0.3249			0.840336
0.95009			0.568182
0.22607			1.14943
0.45372			1.42857
1.0789			1.0101
0.1736			1.20482
0.81121			1.07527
0.67553
0.46544
0.4404
0.99905
1.0432
0.88737

## Sheet: Figure 5D
T50 (s) -control	T50 (s)-transection (s)		Tau (s)-control	Tau(s)-ON_transection
4.5052	1.9591		0.1933	1.6472
0.9364	1.4563		0.4302	0.2273
1.3714	1.4809		0.6421	0.4365
1.4024	2.5351		0.5278	0.8762		Analysis of LFP negativities
1.1708	1.1669		0.2429	0.368
1.1741	1.1029		0.8298	1.2068
0.9946	1.8732		1.5855	2.282
0.5196	1.6012		1.5022	0.3424
0.9729	2.1697		1.0716	1.0118
0.5871	1.3322		1.2287	0.9728
0.6411	1.9549		1.9568	0.3674
0.6126	0.7941		0.5865	1.432
1.4435	1.7005		1.0167	0.9335
0.7074	0.823		0.7125	1.8455
2.1997	1.3844		1.1542	1.2202
2.7413	2.6701		0.6649	0.8793
0.4107	2.1099		1.2153	0.2001
2.0252	2.0614		2.6357	0.9096
1.9271	1.7555		2.2272	2.1828
2.1978	2.0146		1.9839	0.2967
1.4913	1.2287		1.9729	0.1204
2.8518	2.7133		1.1945	0.3226
2.4253	1.6252		3.32	0.2714
1.0891	4.3573		1.758	0.5913
1.2231	0.6657		0.4582	0.3981
3.0481	2.5647		0.8813	0.6
3.981	0.9934		0.575	0.9326
1.3678	1.1081		0.2311	0.2295
2.6405	3.797		1.2075	0.2773
1.7209	4.1932		1.0626	0.4384
2.3931	3.1477		2.1165	0.3961
1.0984	1.4289		0.5211	0.2166
3.4074	1.6021		0.2348	0.1976
1.0268	0.6805		0.4081	0.3306
2.1646	1.717		1.4726	0.59
0.8139	3.57		1.4981	1.1217
3.4562	0.5675		0.0907	0.1679
3.9402	1.0598		1.2066	0.7482
3.2921	1.4304		0.7405	0.1656
2.8703			0.4984
3.7574			0.856
			1.3713
			0.5974
			0.5474
			0.8166
			0.1726

## Sheet: Figure 7B
Control	Control+20 min raclo.	ON transection	ON transection + 20 min raclo.
0.061	0.070524	0.2407	0.30092
0.0848	0.099309	0.071309	0.085766
0.0999	0.17243	0.1294	0.15168
0.0844	0.10529	0.091272	0.089711
0.0616	0.12453	0.2407	0.30092
0.0704	0.21711	0.071309	0.080755
0.064327	0.14075	0.1294	0.15168
0.0614	0.094864	0.091272	0.089711
		0.13571	0.19857
		0.14084	0.11632
		0.1398	0.09366				Data show LFP values (mV)

## Sheet: Figure 7E
Control	Control+20 min CGP
0.068705	0.079735
0.11487	0.049253
0.08065	0.12329
0.083264	0.075196
0.10588	0.085732
0.099027	0.093877
0.15015	0.1055
0.074893	0.039879		Data show LFP values (mV)
0.054972	0.13026
0.04122	0.050957

[truncated: 2 more sheets: Figure 8C, Figure 9C]
